# Supplementary material for: Simultaneous water and electricity harvesting from low-grade heat by coupling a membrane distiller and an electrokinetic power generator
Source: Royal Society of Chemistry journal article supplement (doi:10.1039/d1ta07530f), 2021-01-01
Supplement: d1ta07530f1.pdf [file d1ta07530f1.pdf]

1 Supporting Information

2 **Simultaneous water and electricity harvesting from low-grade heat**  
3 **by coupling membrane distillation system and electrokinetic system**

4 Lu Huang<sup>1,2†</sup>, An He<sup>1†</sup>, Mengyu Miao<sup>1†</sup>, Junxian Pei<sup>3</sup>, Tong Liu<sup>1,2\*</sup>, Xiaojuan Lei<sup>4</sup>,  
5 Kunpeng Shan<sup>1</sup>, Shuting Lei<sup>1</sup>, Yipu Wang<sup>1</sup>, Pinxuan He<sup>1</sup>, Quan Feng<sup>1</sup>, Zhifeng  
6 Huang<sup>1\*</sup>, Xuejiao Hu<sup>1</sup> and Haifeng Jiang<sup>1\*</sup>

7 <sup>1</sup>MOE Key Laboratory of Hydraulic Machinery Transients, School of Power and  
8 Mechanical Engineering, Wuhan University, Wuhan, Hubei, 430072, China

9 <sup>2</sup>School of Mechanical & Electrical Engineering, Wuhan Institute of Technology,  
10 Wuhan, Hubei, 430205, China

11 <sup>3</sup>College of Water Resource & Hydropower, Sichuan University,  
12 Chengdu, 610065, China

13 <sup>4</sup>College of Food Science, Southwest University, Chongqing, 400715, China

14 †These authors contributed equally to this work.

15 \*Corresponding authors. E-mail addresses: liu\_tong@whu.edu.cn (T. Liu),

16 zfhuang@whu.edu.cn (Z. Huang), hfjiang@whu.edu.cn (H. Jiang).

**Table of contents**

|    |                                                                                                            |    |
|----|------------------------------------------------------------------------------------------------------------|----|
| 18 | SI-1 Schematic diagram and photograph of the EPG device.....                                               | 3  |
| 19 | SI-2 The schematic diagram of the experimental measurement system.....                                     | 4  |
| 20 | SI-3 The contact angle measurement of Al <sub>2</sub> O <sub>3</sub> membrane.....                         | 5  |
| 21 | SI-4 Pressure-displacement curves of three paralleled Al <sub>2</sub> O <sub>3</sub> membrane samples..... | 6  |
| 22 | SI-5 The relationship between output voltage and input pressure over time.....                             | 7  |
| 23 | SI-6 The energy exchange efficiency of the EPG device.....                                                 | 8  |
| 24 | SI-7 Dynamic response characteristics of the EPG device.....                                               | 9  |
| 25 | SI-8 The water yield varies with time within 15 hours.....                                                 | 10 |
| 26 | SI-9 The salinity of desalinated water varies with time.....                                               | 11 |
| 27 | SI-10 Open circuit voltage as a function of time within 15 hours.....                                      | 12 |
| 28 | SI-11 A steady-state heat transfer model of the MD-EPG                                                     |    |
| 29 | system.....                                                                                                | 13 |

30 **SI-1 Schematic diagram and photograph of the EPG device**

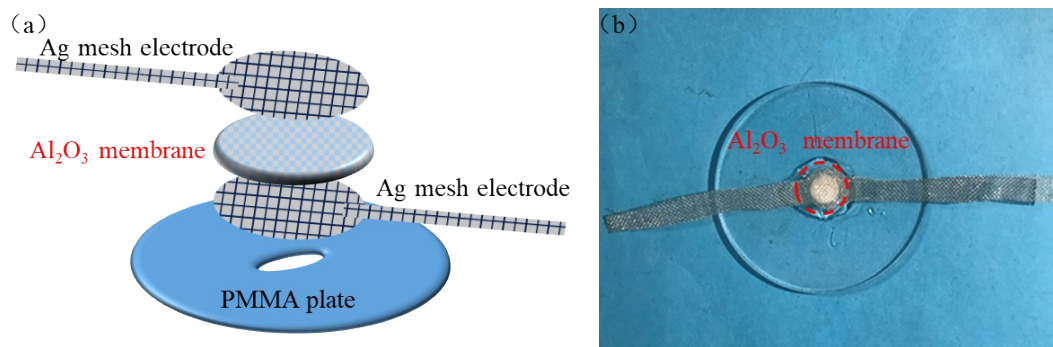

31 Fig. S1 (a) Schematic diagram of the assembly of the EPG device; (b) Physical drawing of the EPG  
32 device.

33 **SI-2 The schematic diagram of the experimental measurement system**

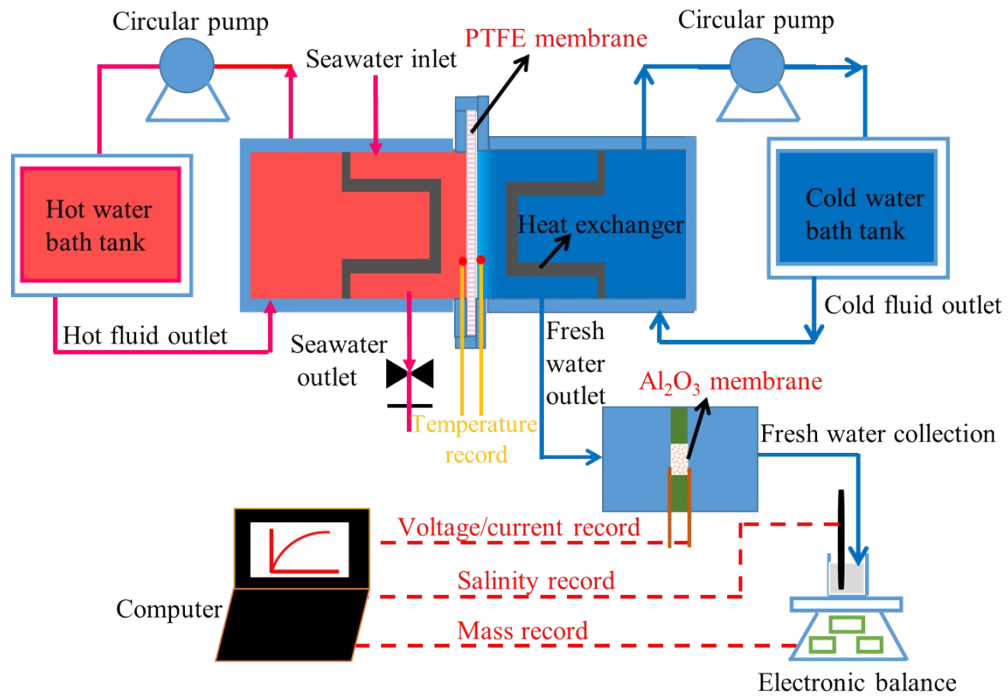

34 Fig. S2 The schematic diagram of the experimental measurement system, including: (1) a computer  
35 for data record and storage, (2) two type K thermocouples for temperature collection, (3) an  
36 electronic balance for weight change record, (4) a source meter for potential/current record, (5) a  
37 conductivity meter for desalted water quality.

38 **SI-3 The contact angle measurement of  $\text{Al}_2\text{O}_3$  membrane**

39

40

41

42

43

44

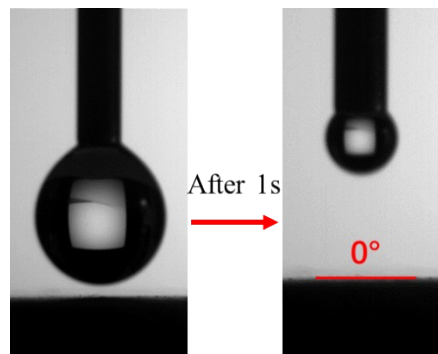

45 Fig. S3 The contact angle measurement of  $\text{Al}_2\text{O}_3$  membrane.

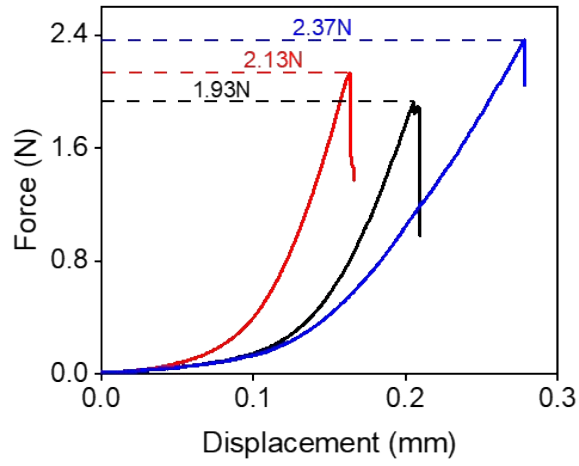

46 **SI-4 Pressure-displacement curves of three paralleled Al<sub>2</sub>O<sub>3</sub> membrane samples**

47 Fig. S4 Pressure-displacement curves of three parallel Al<sub>2</sub>O<sub>3</sub> membrane samples

48 **SI-5 The relationship between output voltage and input pressure over time of the**

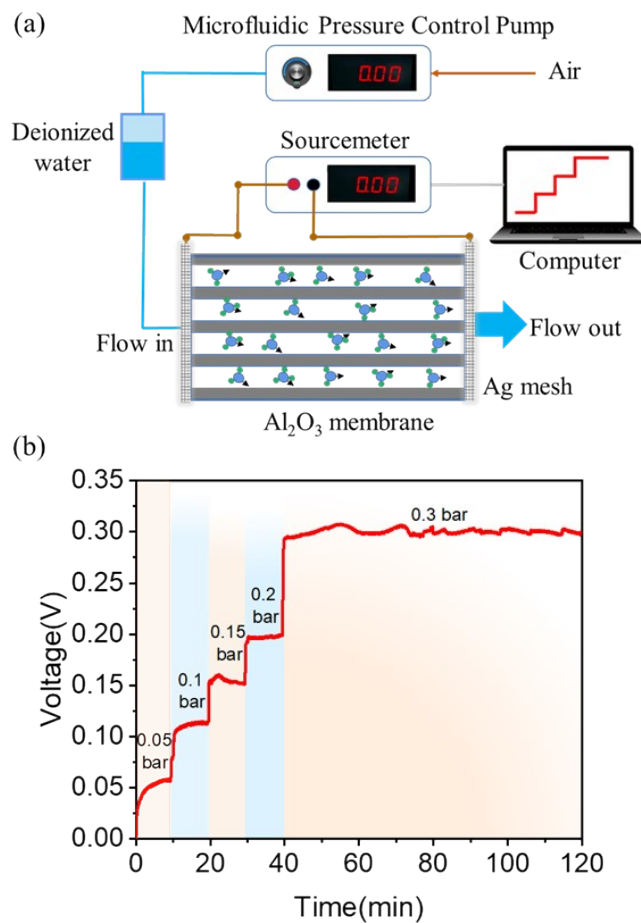

49 **EPG device**

50 Fig. S5 (a) A diagram of the self-made test system; (b) The relationship between output voltage and  
51 input pressure over time.

52 **SI-6 The energy exchange efficiency of the EPG device**

53 The EPG device's efficiency is an important indicator reflecting the utilization rate  
54 of the hydraulic pressure energy, which can be calculated as:

$$\eta = \frac{P_{out}}{P_{in}} = \frac{P_{out}}{\Delta P Q} \quad (S-0)$$

55  
56 where  $P_{out}$  ( $\text{W m}^{-2}$ ) is the maximum output power density of the EPG device under  
57 under different temperature differences, calculated from the I-V curve.  $\Delta P$  (Pa) is  
58 hydraulic pressure difference on both sides of  $\text{Al}_2\text{O}_3$  membrane under different  
59 temperature differences, calibrated by the pressure gauge.  $Q$  ( $\text{m s}^{-1}$ ) is the volume flow  
60 under different temperature differences, obtained by dividing the mass flow by the  
61 water density.

62 In our experiments, the maximum output power density of the EPG system under the  
63 temperature difference of 20 °C, 30 °C and 40 °C is approximately 27  $\mu\text{W m}^{-2}$ , 68  $\mu\text{W}$   
64  $\text{m}^{-2}$ , and 147  $\mu\text{W m}^{-2}$ , respectively. The corresponding hydraulic pressure difference on  
65 both sides of  $\text{Al}_2\text{O}_3$  membrane is ~2.4 KPa, ~3.5 KPa, ~5.2 KPa under the temperature  
66 difference of 20 °C, 30 °C and 40 °C. The corresponding volume flow under the  
67 temperature difference of 20 °C, 30 °C and 40 °C is  $1.36 \times 10^{-6} \text{ m s}^{-1}$ ,  $2.72 \times 10^{-6} \text{ m s}^{-1}$ ,  
68 and  $3.72 \times 10^{-6} \text{ m s}^{-1}$ , respectively. According to formula S-0, it can be calculated that  
69 the corresponding efficiency of the EPG device is 0.83%, 0.71% and 0.76% under the  
70 temperature difference of 20 °C, 30 °C and 40 °C.



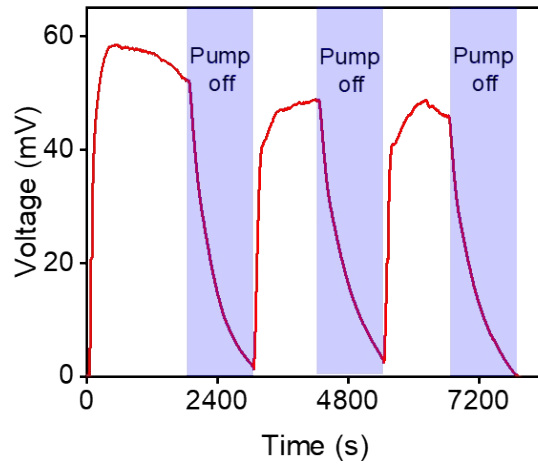

73 **characteristics of the EPG device**

74

75

76

77

78

79

80

81

82 Fig. S6 The influence of periodically switching circulating pump on open circuit voltage of the EPG

83 device.

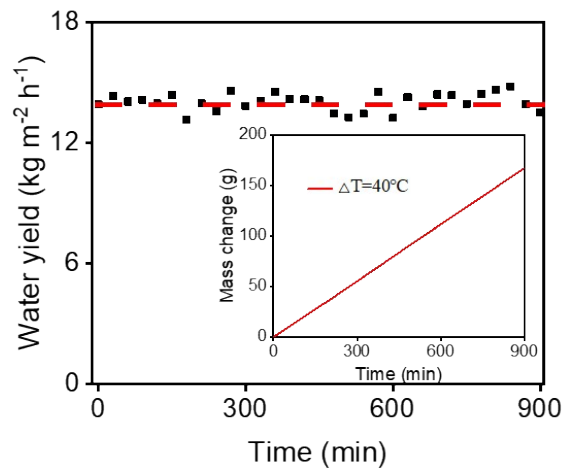

84 **SI-8 The water yield varies with time within 15 hours**

85 Fig. S7 The water yield varies with time within 15 hours and the inset is the mass change over time

86 at a temperature difference of 40°C

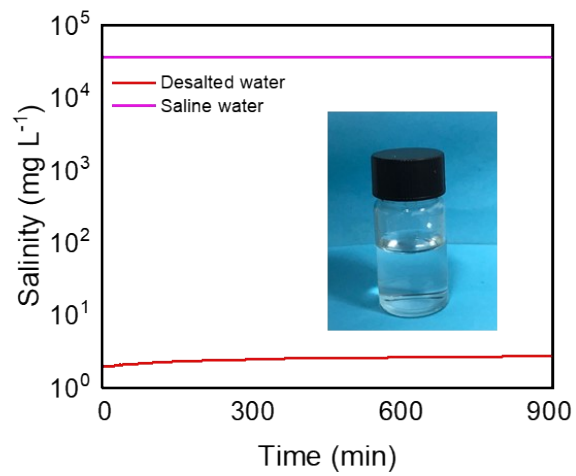

87 **SI-9 The salinity of desalinated water varies with time**

88 Fig. S8 The salinity of desalinated water varies with time.

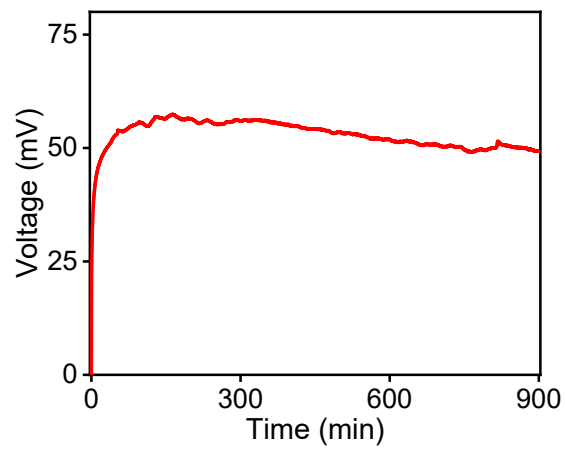

89 **SI-10 Open circuit voltage as a function of time within 15 hours**

90 Fig. S9 Open circuit voltage as a function of time within 15 hours.

## 91 SI-11 A steady-state heat transfer model of the MD-EPG system

92 Fig. 4a shows the steady-state energy and mass transfer equilibrium diagram of the  
93 MD-EPG system. In order to more specifically analyze the internal heat and mass  
94 transfer and energy conversion process of the tandem system, we have made the  
95 following assumptions for the model:

96 1. The model is a steady-state model. Heat and mass are dominated by one-  
97 dimensional transfer;

98 2. Suppose the heat source on the high temperature side of the system comes from  
99 low-grade thermal energy in the environment;

100 3. Ignore the temperature polarization effect, that is, the temperature on both sides of  
101 the hydrophobic membrane remains unchanged;

102 4. The influence of the change in salt concentration caused by the evaporation of salt  
103 water in the system on water evaporation is negligible;

104 5. Regardless of the hydraulic pressure breaking through the liquid entry pressure of  
105 the hydrophobic membrane, the MD process becomes invalid.

106 Based on the theoretical model, the corresponding mathematical equations of the heat  
107 and mass transfer process and the relationship of energy and mass conservation are  
108 obtained. The input energy of the entire system ( $Q_{in}$ ) is the sum of the latent heat taken  
109 away by water evaporation through the hydrophobic membrane ( $Q_{eva}$ ) and the heat  
110 conducted through the solid part of the PTFE membrane ( $Q_{con}$ ). According to the law  
111 of conservation of energy, the energy conservation relationship of the MD unit can be  
112 described as :<sup>1</sup>

$$113 \quad Q_{in} = Q_{con} + Q_{eva} \quad (S-1)$$

$$114 \quad Q_{eva} = JH_v \quad (S-2)$$

$$115 \quad Q_{con} = \frac{k_{eff}}{l} * (T_e - T_c) \quad (S-3)$$

$$116 \quad k_{eff} = k_{air} \cdot \varepsilon_m + k_{mem} (1 - \varepsilon_m) \quad (S-4)$$

$$117 \quad H_v = 1.05 \times 10^{-7} T_e^4 - 4.17 \times 10^{-5} T_e^3 + 0.003 T_e^2 - 2.43 T_e + 2501.9 \times 10^3 \quad (S-5)$$

118 where  $T_e$  is the evaporation side temperature of the PTFE membrane,  $T_c$  is the  
 119 condensation side temperature of the PTFE membrane (298.15 K),  $k_{\text{eff}}$  is the effective  
 120 thermal conductivity of the hydrophobic PTFE membrane ( $\text{W m}^{-1} \text{K}^{-1}$ );  $k_{\text{mem}}$  and  $k_{\text{air}}$  are  
 121 the thermal conductivity of PTFE membrane and air ( $\text{W m}^{-1} \text{K}^{-1}$ ), which are  $0.25 \text{ W m}^{-1}$   
 122  $\text{K}^{-1}$  and  $0.028 \text{ W m}^{-1} \text{K}^{-1}$ , respectively;  $\varepsilon_m$  is the porosity of the PTFE membrane (0.85,  
 123 data from manufacturers),  $l$  is the thickness of the PTFE membrane ;  $J$  is the mass flux  
 124 of water vapor across the membrane ( $\text{kg m}^{-2} \text{s}^{-1}$ ),  $H_v$  is the latent heat of vaporization of  
 125 water ( $\text{J kg}^{-1}$ ).

126 The vapor flux through the hydrophobic PTFE membrane is:<sup>2</sup>

$$127 \quad J = B_w (P_e - P_{c,h}) \quad (S-6)$$

128 where  $B_w$  is the vapor diffusion coefficient. Because the average free path of water  
 129 vapor is equal to the pore size, the diffusion mode of water vapor through hydrophobic  
 130 membrane is dominated by molecular diffusion and Knudsen diffusion. The calculation  
 131 process is as follows:<sup>3</sup>

$$132 \quad B_w = \frac{1}{\frac{1}{B_m} + \frac{1}{B_k}} \quad (S-7)$$

133 The coefficient  $B_m$  is used to describe the strength of molecular diffusion, and its  
 134 expression is:

$$135 \quad B_m = \frac{\varepsilon D M}{\tau L R T_m / (P_0 - P_m)} \quad (S-8)$$

136 The coefficient  $B_k$  is used to describe Knudsen diffusion, and its expression is:<sup>4</sup>

$$137 \quad B_k = \frac{2 \varepsilon_m r M}{3 \tau L R} * \sqrt{\frac{8 R \pi M}{T_m}} \quad (S-9)$$

$$138 \quad D = 1.894 \times 10^{-5} (T_m + 273.15) / P_0 \quad (S-10)$$

$$139 \quad \tau = \frac{(2 - \varepsilon)^2}{\varepsilon} \quad (S-11)$$

$$140 \quad T_m = (T_e + T_c) / 2 \quad (S-12)$$

141 where  $D$  is the diffusion coefficient of water vapor in the air;  $M$  is the molar mass of  
 142 water ( $0.018 \text{ kg mol}^{-1}$ );  $\tau$  is the tortuosity of the PTFE membrane;  $r$  is the average radius  
 143 of the pores of the PTFE membrane ( $0.5 \text{ }\mu\text{m}$ );  $R$  is the gas constant ( $8.314 \text{ J K}^{-1} \text{ mol}^{-1}$ );  
 144  $T_m$  is the average temperature of the entire PTFE membrane;  $P_0$  is the atmospheric  
 145 pressure ( $101300 \text{ Pa}$ ).

146 The vapor pressure on the high temperature side ( $P_e$ ) and ( $P_m$ ) are calculated by  
 147 Antoine equation under atmospheric pressure:<sup>5, 6</sup>

$$148 \quad P_e = \exp\left[\frac{23.1964 - 3816.44}{-46.13 + T_e + 273.15}\right] \quad (\text{S-13})$$

$$149 \quad P_m = \exp\left[\frac{23.1964 - 3816.44}{-46.13 + T_m + 273.15}\right] \quad (\text{S-14})$$

150 For the vapor pressure at the condensing side ( $P_{c,h}$ ), the increase of hydraulic pressure  
 151 in the condensing chamber will hinder the vapor transfer process across the  
 152 hydrophobic PTFE membrane, which is manifested by the increase in the partial  
 153 pressure of water vapor on the condensation side of the hydrophobic membrane. The  
 154 partial vapor pressure on the condensation side of the PTFE membrane can be  
 155 calculated by the Kelvin equation modified by the hydrostatic pressure:<sup>7</sup>

$$156 \quad P_{c,h} = P_c e^{\frac{P_h V_m}{RT_c}} \quad (\text{S-15})$$

157 where  $P_c$  is the corresponding partial pressure of water vapor at  $T_c$  temperature under  
 158 atmospheric pressure, which is determined by the Antoine equation under atmospheric  
 159 pressure.  $V_m$  is the molar volume of liquid water ( $18 \text{ cm}^3 \text{ mol}^{-1}$ ).  $P_h$  is the hydraulic  
 160 pressure in the confined space, and the corresponding value can be calculated using the  
 161 flow resistance model; The flow resistance ( $R$ ) of the  $\text{Al}_2\text{O}_3$  membrane is calculated as  
 162 follows:

$$163 \quad R = \frac{\mu \delta}{KA} \quad (\text{S-16})$$

164 where  $\mu$  is the dynamic viscosity of water at  $25 \text{ }^\circ\text{C}$ , the value is  $0.8937 \times 10^{-3} \text{ Pa} \cdot \text{s}$ ,  $\delta$   
 165 is the thickness of the  $\text{Al}_2\text{O}_3$  membrane (m),  $K$  is the permeability of the  $\text{Al}_2\text{O}_3$   
 166 membrane ( $\text{m}^2$ ), which reflects the difficulty of water flowing through its internal pores.  
 167 The theoretical calculation value of  $K$  in this section is set to  $2 \times 10^{-17}$ .  $A$  is the area of

168 Al<sub>2</sub>O<sub>3</sub> membrane (m<sup>2</sup>).

169 According to the flow resistance of the Al<sub>2</sub>O<sub>3</sub> membrane and the volume flow  
170 through the membrane, the hydraulic pressure difference ( $\Delta P$ ) in the enclosed space can  
171 be obtained, which is the hydraulic pressure  $P_h$  in the enclosed space, so the following  
172 expression is obtained:

$$173 \quad P_h = \Delta P = JR = J \frac{A_1 \mu \delta}{KA\rho} \quad (S-17)$$

174 Where  $\rho$  is the density of desalinated water (1000 kg m<sup>-3</sup>),  $A_1$  is the area of PTFE  
175 hydrophobic membrane (m<sup>2</sup>).

176 According to the theoretical calculation results of hydraulic pressure difference ( $\Delta P$ )  
177 on both sides of Al<sub>2</sub>O<sub>3</sub> membrane and vapor flux ( $J$ ) through the membrane under  
178 different transmembrane temperature difference, the maximum volume work output of  
179 alumina microporous membrane can be determined. The volume work calculation  
180 formula of the system is as follows: <sup>8</sup>

$$181 \quad W = J \frac{\Delta P}{\rho} \quad (S-18)$$

182 In order to judge the heat-work conversion performance of the system more clearly,  
183 we use the relative Carnot cycle efficiency of the system to evaluate the performance  
184 of converting solar thermal energy into fluid mechanical energy. The relative Carnot  
185 cycle efficiency ( $\eta$ ) of the system is calculated as follows: <sup>8</sup>

$$186 \quad \eta = \frac{W}{\eta_c Q_{in}} \quad (S-19)$$

$$187 \quad \eta_c = 1 - \frac{T_c}{T_e} \quad (S-20)$$

188 where  $Q_{in}$  is the input energy of the entire system,  $\eta_c$  is the Carnot cycle efficiency of  
189 the system.

## 190 **References**

191 1. M. Rahimi, A. P. Straub, F. Zhang, X. Zhu, M. Elimelech, C. A. Gorski and B. E.  
192 Logan, *Energy Environ. Sci.*, 2018, **11**, 276-285.



- 193 2. F. Mahmoudi, A. Date and A. Akbarzadeh, *J. Membrane Sci.*, 2019, **572**, 230-245.
- 194 3. M. Khayet. *Adv. Colloid Interface Sci.*, 2011, **164**, 56-88.
- 195 4. W. Kast, C. R. Hohenthanner, *Int. J. Heat Mass Transfer*, 2000, **43**, 807-823.
- 196 5. L. Huang, H. Jiang, Y. Wang, Z. Ouyang, W. Wang, B. Yang, H. Liu and X. Hu,  
197 *Desalination*, 2020, **477**, 114260.
- 198 6. L. Huang, Y. Wang, R. He, X. Kong, S. Lei, Y. Liu, B. Wang, H. Jiang, H. Liu, K.  
199 Liu and X. Hu, *Desalination*, 2020, **488**, 114533.
- 200 7. A. P. Straub, N. Y. Yip, S. Lin, J. Lee and M. Elimelech, *Nat. Energy*, 2016, **1**, 16090.
- 201 8. A. P. Straub and M. Elimelech, *Environ. Sci. Technol.*, 2017, **51**, 12925-12937.
- 202
